# Supplementary material
Source: Elsevier journal article supplement (https://www.sciencedirect.com/science/article/pii/S0213911118302450)
Supplement: mmc1 [file S0213911118302450:mmc1.docx]

**Apéndice 1**

**Categorías de las variables originales del registro de la Dirección General de Tráfico (en mayúsculas aparece el nombre original de la variable en el registro ARENA2)**

1. VARIABLES EMPLEADAS PARA LA DEFINICIÓN DE CONDUCTOR RESPONSABLE
   1. Presunta infracción del conductor:

Presuntamente no existe infracción

No respetar el STOP

No respetar "ceda el paso"

No respetar el semáforo

No respetar la norma genérica de prioridad

No respetar el paso de peatones

No respetar las indicaciones de un agente

No respetar otras señales de prioridad de paso

Invadir parcialmente el sentido contrario

Circular en zigzag

Girar o cambiar de sentido incorrectamente

Circular marcha atrás de manera incorrecta

Adelantar antirreglamentariamente

Frenar sin causa justificada

No mantener el intervalo de seguridad

Parado o en estacionamiento prohibido o peligroso

No indicar o indicar mal una maniobra

Circular en sentido contrario

Circular por lugar prohibido

Competiciones o carreras

Se desconoce

Sin especificar

- 1. Presunta infracción sobre la velocidad del conductor:

Ninguna

Velocidad inadecuada para las condiciones de la vía

Sobrepasar la velocidad establecida

Marcha lenta entorpeciendo la circulación

Se desconoce

Sin especificar

- 1. Otra infracción del conductor:

Ninguna

Circular sin luz

Circular deslumbrando

Carga mal acondicionada

Exceso de carga

Desprendimiento de carga

Apertura de puertas sin precaución

Exceso de ocupantes

Otra infracción

Se desconoce

- 1. Presuntos errores:

No se aprecian errores

No ver una señal

No ver un vehículo/peatón/obstáculo...

No entender una señal de tráfico o confundirla

Indecisión, demora o retraso en tomar una decisión

Ejecución incorrecta de maniobra o maniobra inadecuada

Olvidos (intermitentes, luces...)

Sin especificar

1. VARIABLE DE EXPOSICIÓN
   1. Tipo de vehículo:

Turismo

Furgoneta

Todoterreno

Bicicleta

Ciclomotor

Motocicleta hasta 125 cc

Motocicleta >125 cc

Quad ligero

Quad no ligero

Cuadriciclo ligero

Cuadriciclo no ligero

Autocaravana

Maquinaria de obras y servicios

Maquinaría agrícola

Microbús ≤17 ocupantes

Autobús

Autobús articulado

Tranvía

Camión rígido

Tractocamión (cabeza tractora)

Vehículo articulado

Tren/Metro

Otros vehículos sin motor

Otros vehículos con motor

Sin especificar

Ciclo

Sin especificar

1. OTRAS VARIABLES INDEPENDIENTES
   1. Prueba de alcoholemia:

No se realiza prueba

No, porque se niega

No, porque no puede

Prueba en aire

Se desconoce

Sin especificar

- 1. Tasa de alcoholemia 1: valor en g/l o 9999 (sin especificar)
  2. Prueba de drogas:

No se realiza prueba

En saliva

En sangre

Otras

Se desconoce

Sin especificar

- 1. Confirmado amp = 1
  2. Confirmado bdz = 1
  3. Confirmado coc = 1
  4. Confirmado thc = 1
  5. Confirmado meth = 1
  6. Confirmado opi = 1
  7. Confirmado otras = 1
  8. Accesorio de seguridad (cinturón):

Sí

No

Se desconoce

No aplica

Sin especificar

- 1. Accesorio de seguridad (casco):

Sí

No

Supuestamente expulsado

Se desconoce

3.13. MOTIVO DEL DESPLAZAMIENTO

Transporte profesional de mercancías

Taxi

Bus urbano

Bus escolar

Bus en transporte de menores

Bus de línea regular

Bus de línea discrecional

Servicio de limpieza o recogida de basura

Servicio de mantenimiento viario

Bomberos, policía o ambulancia

*In itinere*

En misión

Ocio y entretenimiento

Actividad deportiva particular

Estudiante hacia centro de estudios

Transporte de menores al colegio

Ida/regreso de puentes, festivos, vacaciones

En prácticas de autoescuela

Servicio de auxilio en carretera

Otras actividades

Se desconoce

Sin especificar

**Apéndice 2**

**Modelos multivariantes. Estimación de las *odds ratios* ajustadas para las restantes variables independientes**

|  |  | **Modelo 1** | | | **Modelo 2** | | | **Modelo 3** | | |
| --- | --- | --- | --- | --- | --- | --- | --- | --- | --- | --- |
| **Variable** | **Categoría** | **OR** | **IC95%** | | **OR** | **IC95%** | | **OR** | **IC95%** | |
| Sexo | Varón | 1 | Referencia | | 1 | Referencia | | 1 | Referencia | |
|  | Mujer | 0,86 | 0,83 | 0,90 | 0,89 | 0,84 | 0,95 | 0,89 | 0,84 | 0,84 |
|  | <16 años | 6,11 | 4,55 | 8,20 | 6,94 | 4,44 | 10,85 | 3,61 | 1,81 | 1,81 |
| Edad | 16-17 años | 2,74 | 2,24 | 3,34 | 2,41 | 1,77 | 3,28 | 2,12 | 1,52 | 1,52 |
|  | 18-24 años | 1,70 | 1,60 | 1,81 | 1,74 | 1,58 | 1,90 | 1,73 | 1,57 | 1,57 |
|  | 24-34 años | 1,15 | 1,09 | 1,20 | 1,13 | 1,05 | 1,21 | 1,13 | 1,05 | 1,05 |
|  | 35-44 años | 1,00 | Referencia | | 1 | Referencia | | 1 | Referencia | |
|  | 45-54 años | 1,02 | 0,97 | 1,07 | 0,99 | 0,92 | 1,07 | 0,99 | 0,92 | 0,92 |
|  | 55-64 años | 1,10 | 1,04 | 1,18 | 1,04 | 0,95 | 1,14 | 1,04 | 0,94 | 0,94 |
|  | 65-74 años | 1,50 | 1,38 | 1,63 | 1,49 | 1,33 | 1,67 | 1,50 | 1,33 | 1,33 |
|  | >74 años | 2,93 | 2,60 | 3,30 | 2,88 | 2,44 | 3,39 | 2,93 | 2,46 | 2,46 |
| Alcohol | Prueba no realizada | 1,00 | Referencia | | 1 | Referencia | | 1 | Referencia | |
|  | Prueba negativa | 1,14 | 1,07 | 1,22 | 1,14 | 1,05 | 1,25 | 1,20 | 1,10 | 1,10 |
|  | Prueba positiva | 14,88 | 12,25 | 18,07 | 15,42 | 11,82 | 20,12 | 17,41 | 13,15 | 13,15 |
| Drogas | Prueba no realizada | 1,00 | Referencia | | 1 | Referencia | | 1 | Referencia | |
|  | Prueba negativa | 1,22 | 1,04 | 1,43 | 1,49 | 1,22 | 1,83 | 1,66 | 1,34 | 1,34 |
|  | Prueba positiva | 4,77 | 2,77 | 8,22 | 4,51 | 2,32 | 8,77 | 4,77 | 2,39 | 2,39 |
| Uso de accesorios de seguridad | Sí | 1,00 | Referencia | | 1 | Referencia | | 1 | Referencia | |
|  | No |  |  |  | 2,38 | 1,94 | 2,93 | 1,74 | 1,34 | 1,34 |
| Tipo de conducción | Profesional | 1,00 | Referencia | | 1 | Referencia | | 1 | Referencia | |
|  | Particular |  |  |  | 1,31 | 1,14 | 1,50 | 1,30 | 1,13 | 1,13 |
| Antigüedad del vehículo (incremento anual) | | |  |  |  |  |  | 1,00 | 1,00 | 1,00 |

IC95%: intervalo de confianza del 95%; OR: *odds ratio*.
